# Supplementary material for: Partitioning into phosphatidylcholine–cholesterol membranes: liposome measurements, coarse-grained simulations, and implications for bioaccumulation
Source: Royal Society of Chemistry journal article supplement (doi:10.1039/d3em00081h), 2023-01-01
Supplement: d3em00081h1.xlsx [file d3em00081h1.xlsx]

## Sheet: 3-nitroaniline
	WS5-AA			WS2			WS5-AS			WS1			Combined individual points
	Points	Mean	St. Dev.	Points	Mean	St. Dev.	Points	Mean	St. Dev.	Points	Mean	St. Dev.
	2.69567			2.23474			2.32134			2.77723
10uM, 0%	2.62031	2.62042	0.0751883	2.05699	2.15685	0.0908891	2.24718	2.29832	0.0443539	2.80696	2.81642	0.0446736	2.473	0.27735
	2.54529			2.17884			2.32642			2.86506
	2.38422			2.14128			2.17737			2.32936
20uM, 0%	2.31665	2.38673	0.0713713	1.78026	1.92431	0.191237	2.23038	2.16622	0.0704025	2.74744	2.54826	0.20974	2.25638	0.27683		2.33205	0.309206
	2.45932			1.8514			2.09091			2.56799
	2.66751			1.80789			2.51371			2.14563
50uM, 0%	2.71141	2.67751	0.0301721	1.81035	1.83256	0.0406162	2.12664	2.2162	0.264366	2.41563	2.34076	0.170503	2.26676	0.343627
	2.65361			1.87944			2.00824			2.46102
	2.55657			1.68562			2.4559			2.32835
10uM, 15%	2.49727	2.53534	0.0330374	1.67084	1.71425	0.0628154	2.28112	2.31616	0.125939	2.18945	2.2786	0.0773761	2.21108	0.324251
	2.55216			1.78627			2.21145			2.31798
	2.42538			2.08298			2.26279			1.64718
20uM, 15%	2.55409	2.50419	0.0690546	1.84837	1.94223	0.124138		2.26279	#DIV/0!	2.33562	2.04738	0.35761	2.17442	0.305568		2.1407	0.367866
	2.53311			1.89533						2.15933
	2.66835			2.02145			2.14752			1.50187
50uM, 15%	2.73906	2.67347	0.0631809	1.59328	1.74747	0.237894	2.0561	2.00094	0.180591	#NUM!	1.55008	0.0681818	2.03326	0.462141
	2.61301			1.62768			1.79921			1.5983
	1.91237			1.92763			1.82965			2.74215
10uM, 30%	1.96225	1.87263	0.11477	1.83947	2.04595	0.284721	2.41998	2.20738	0.327982	2.92525	2.757	0.161336	2.22074	0.401603
	1.74327			2.37076			2.3725			2.60361
				1.7298			2.18565			2.45465
20uM, 30%				1.90619	1.86429	0.119199	#DIV/0!	2.18565	#DIV/0!	2.64641	2.46813	0.171931	2.16899	0.325268		2.07984	0.384741
				1.95689			#DIV/0!			2.30334
	2.28435			1.44215			1.83844			1.74304
50uM, 30%	2.2584	2.30401	0.0579959	1.24818	1.44663	0.200728	1.84946	1.93755	0.162207	2.0118	1.85952	0.137915	1.88693	0.342634
	2.36928			1.64956			2.12474			1.82371

## Sheet: diclofenac
	WS1			WS2
	Points	Mean	St. Dev.	Points	Mean	St. Dev.
	3.18741			2.66174
10uM, 0%	3.19769	3.21464	0.0385974	2.58565	2.61292	0.0423799	2.91378	0.331565
	3.25881			2.59136
	1.56001			2.75476
20uM, 0%	2.15995	2.05275	0.448851	2.6843	2.69448	0.0558819	2.37362	0.453191		2.78164	0.557414
	2.43829			2.64439
	3.53055			2.45729
50uM, 0%	3.6725	3.62607	0.08273	2.4952	2.48897	0.0290666	3.05752	0.625281
	3.67515			2.51441
	2.90844			2.68577
10uM, 15%	2.87846	2.91102	0.0339199	2.66734	2.65588	0.0369764	2.78345	0.143303
	2.94615			2.61453
	2.6608			2.70899
20uM, 15%	2.89184	2.81008	0.129477	2.6633	2.66117	0.0489191	2.73563	0.119647		2.70051	0.149373
	2.87761			2.61122
	2.64578			2.55867
50uM, 15%	2.64293	2.7158	0.0990259	2.4432	2.47343	0.0748609	2.58247	0.138489
	2.78582			2.4184
	2.73565			2.44442
10uM, 30%	2.95724	2.79116	0.146443	2.34063	2.46485	0.135592	2.628	0.218806
	2.68058			2.6095
	2.56777			2.51172
20uM, 30%	2.73199	2.58287	0.142168	2.56279	2.54209	0.0268701	2.56248	0.0941934		2.52312	0.159297
	2.44886			2.55175
	2.44273			2.26046
50uM, 30%	2.54377	2.43403	0.114344	2.39416	2.32369	0.0671411	2.37886	0.10337
	2.31558			2.31647

## Sheet: propranolol
	Points	Mean	St. Dev.
	3.25096
10uM, 0%	3.28513	3.29725	0.0533979
	3.35567
	2.92842
20uM, 0%	3.15673	3.06778	0.12222		3.11448	0.163193
	3.1182
	2.88764
50uM, 0%	2.98629	2.9784	0.0870816
	3.06127
	2.93766
10uM, 15%	2.91067	2.94103	0.0321814
	2.97477
	2.63427
20uM, 15%	2.83996	2.77167	0.118995		2.78604	0.147015
	2.84078
	2.59974
50uM, 15%	2.60753	2.66436	0.0913825
	2.72898
	2.96601
10uM, 30%	3.13028	3.0011	0.115695
	2.90701
	2.73596
20uM, 30%	2.87551	2.76043	0.105005		2.7945	0.187519
	2.66982
	2.60561
50uM, 30%	2.7052	2.62198	0.0763661
	2.55512

## Sheet: ddao-c12
	Points	Mean	St. Dev.
	3.64718
10uM, 0%	3.67442	3.71591	0.0964125
	3.82612
	3.06173
20uM, 0%	3.27734	3.19644	0.117443		3.39593	0.255919
	3.25025
	3.21163
50uM, 0%	3.27923	3.27546	0.0620333
	3.33552
	3.15137
10uM, 15%	3.15357	3.16815	0.0271738
	3.1995
	2.84179
20uM, 15%	3.04201	2.97304	0.113711		3.05191	0.108349
	3.03531
	2.98524
50uM, 15%	2.99832	3.02265	0.0528976
	3.06005
	3.11829
10uM, 30%	3.27333	3.14003	0.123868
	3.02847
	2.79178
20uM, 30%	2.84427	2.78872	0.057136		2.95156	0.168754
	2.73012
	2.93137
50uM, 30%	2.95844	2.92593	0.0355465
	2.88797

## Sheet: sb3-10
	Points	Mean	St. Dev.
	2.53774
10uM, 0%	2.60363	2.63742	0.120195
	2.77089
	2.03953
20uM, 0%	2.68543	2.4331	0.345337		2.36704	0.379495
	2.57435
	1.58743
50uM, 0%	2.15696	2.03059	0.395427
	2.34739
	2.75746
10uM, 15%	2.68871	2.73262	0.0381349
	2.75169
	1.32193
20uM, 15%	2.32504	1.96823	0.560726		2.02222	0.724883
	2.25772
	1.13092
50uM, 15%	0.902845	1.5973	0.65957
	2.06369
	2.84738
10uM, 30%	3.07766	2.91419	0.142348
	2.81755
	2.39462
20uM, 30%	2.69841	2.46712	0.204898		2.48582	0.401425
	2.30832
	2.10548
50uM, 30%	2.29415	2.07614	0.234062
	1.82879

## Sheet: hexylamine
	Points	Mean	St. Dev.
	2.46586
10uM, 0%	2.52979	2.41808	0.141773
	2.25859
	#VALUE!
20uM, 0%	#VALUE!	1.62943	#DIV/0!		2.23069	0.32067
	1.62943
	2.24193
50uM, 0%	2.4785	2.24371	0.233896
	2.01072
	#VALUE!
10uM, 15%	#VALUE!	#VALUE!	#VALUE!
	#VALUE!
	2.26027
20uM, 15%	2.37614	2.42698	0.197113		2.30854	0.200136
	2.64453
	2.33992
50uM, 15%	2.16379	2.1901	0.138553
	2.06658
	#VALUE!
10uM, 30%	#VALUE!	#VALUE!	#VALUE!
	#VALUE!
	#VALUE!
20uM, 30%	#VALUE!	#VALUE!	#VALUE!		#VALUE!	#VALUE!
	#VALUE!
	#VALUE!
50uM, 30%	#VALUE!	#VALUE!	#VALUE!
	#VALUE!

## Sheet: dihexylamine
	Points	Mean	St. Dev.
	2.15182
10uM, 0%	1.61388	1.88285	0.380379
	#VALUE!
	2.4597
20uM, 0%	2.38271	2.42953	0.0411079		2.44123	0.41653
	2.44617
	2.82744
50uM, 0%	2.83227	2.8252	0.0084174
	2.81588
	2.47183
10uM, 15%	2.39493	2.44056	0.0404073
	2.45491
	2.39378
20uM, 15%	2.4729	2.43661	0.0399581		2.56015	0.185216
	2.44314
	2.82728
50uM, 15%	2.81458	2.80328	0.0312315
	2.76797
	#VALUE!
10uM, 30%	#VALUE!	#VALUE!	#VALUE!
	#VALUE!
	#VALUE!
20uM, 30%	1.59619	1.59619	#DIV/0!		2.35998	0.510027
	#VALUE!
	2.61258
50uM, 30%	2.58	2.61458	0.0356195
	2.65116

## Sheet: octyl sulfate
	Points	Mean	St. Dev.
	2.5428
10uM, 0%	2.59114	2.58345	0.0374062
	2.61641
	2.32761
20uM, 0%	2.11485	2.11261	0.216138		2.21547	0.348563
	1.89535
	2.32213
50uM, 0%	1.86344	1.95036	0.336833
	1.6655
	2.67824
10uM, 15%	2.32369	2.53094	0.184724
	2.5909
	2.12756
20uM, 15%	#VALUE!	1.49031	0.901206		2.0108	0.611556
	0.853058
	2.03119
50uM, 15%	2.08587	1.83767	0.383528
	1.39593
	2.45518
10uM, 30%	2.84951	2.62441	0.203014
	2.56853
	2.15252
20uM, 30%	#DIV/0!	2.15252	#DIV/0!		2.16386	0.602139
	#DIV/0!
	#VALUE!
50uM, 30%	1.20019	1.47872	0.3939
	1.75725

## Sheet: decyl sulfate
	Points	Mean	St. Dev.
	3.69663
10uM, 0%	3.75727	3.7357	0.0338897
	3.75319
	3.64033
20uM, 0%	3.49336	3.53182	0.0952917		3.49972	0.22571
	3.46176
	3.25839
50uM, 0%	3.20642	3.23164	0.0260192
	3.2301
	3.76229
10uM, 15%	3.55704	3.70198	0.126106
	3.7866
	3.40983
20uM, 15%	3.32772	3.38024	0.0456107		3.38759	0.292846
	3.40319
	3.18638
50uM, 15%	3.19165	3.08055	0.187891
	2.86361
	3.57516
10uM, 30%	3.83497	3.66963	0.143675
	3.59876
	3.38767
20uM, 30%	#DIV/0!	3.38767	#DIV/0!		3.387	0.297149
	#DIV/0!
	3.04755
50uM, 30%	3.08745	3.13245	0.0636528
	3.17746

## Sheet: dodecyl sulfate
	Points	Mean	St. Dev.
	4.18226
10uM, 0%	4.22693	4.18862	0.0355535
	4.15668
	5.21041
20uM, 0%	4.26673	4.73857	0.667285		4.40859	0.374579
	#DIV/0!
	#DIV/0!
50uM, 0%	4.28379	4.40855	0.176441
	4.53331
	4.03285
10uM, 15%	4.0378	4.04359	0.0145403
	4.06014
	4.19636
20uM, 15%	#DIV/0!	4.21948	0.0326918		3.98474	0.328467
	4.24259
	#DIV/0!
50uM, 15%	#DIV/0!	3.3387	#DIV/0!
	3.3387
	3.98207
10uM, 30%	4.18175	4.03536	0.128332
	3.94226
	#DIV/0!
20uM, 30%	4.38313	4.48552	0.14481		4.21964	0.243974
	4.58792
	#DIV/0!
50uM, 30%	#DIV/0!	4.24074	#DIV/0!
	4.24074
